# Supplementary material for: PI3K regulates the activation of NLRP3 inflammasome in atherosclerosis through part-dependent AKT signaling pathway
Source: PubMed Central journal article supplement — Exp Anim. 2021 Jun 22;70(4):488–97. doi: 10.1538/expanim.21-0002 (PMC8614019; doi:10.1538/expanim.21-0002), 2021-06-22
Supplement: expanim-70-488-s001.pdf [file expanim-70-488-s001.pdf]

## Supplement figure 1

We use image pro plus to measure density. The following is the measurement procedure.

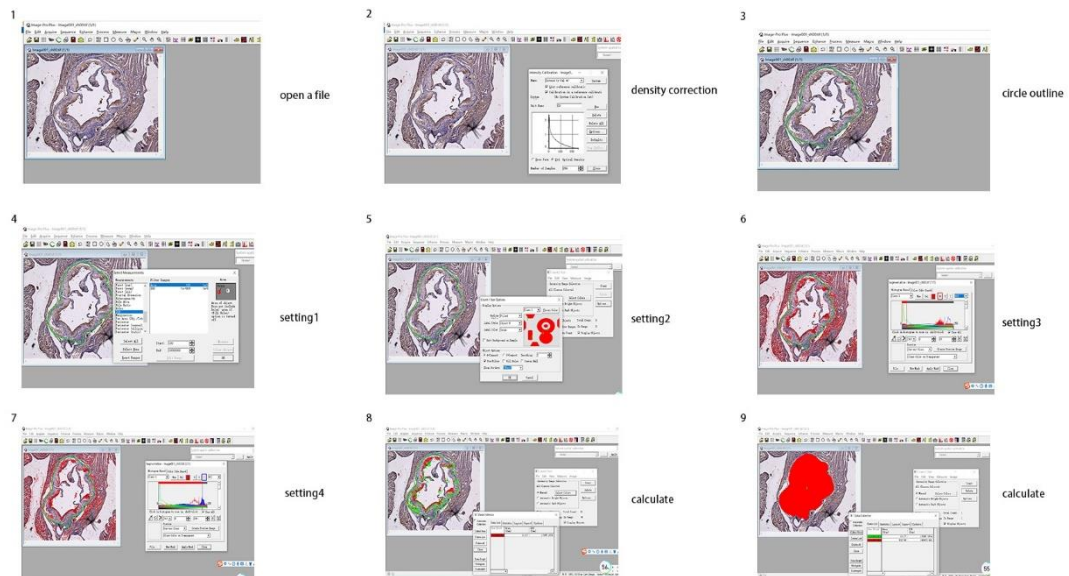

## Supplement figure 2

### Wound-healing migration assay

Increased migration and invasion activities were found in THP-1 cells cultured with Ox-LDL, and cell migration was inhibited in GDC0941+ox-LDL and MK2206+ox-LDL groups, especially in GDC0941+ox-LDL group.

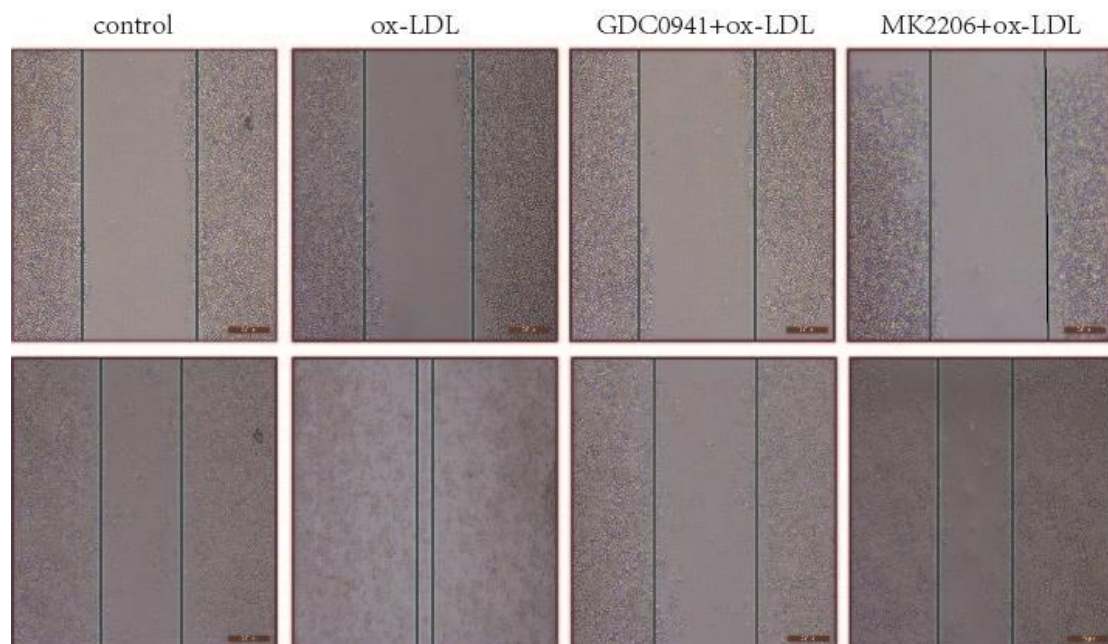

Figure legend

THP-1 monocyte-derived macrophages were treated with or without GDC0941/MK2206 followed by Ox-LDL. After 24 hours post-transfection, wound closure was photographed.

### Supplement figure 3

#### The expression of caspase-3 in mice treat with GDC0941

The expression of caspase-3 was remarkably increased in high-fat diet-induced atherosclerotic mice after treatment with GDC0941+HFD group.

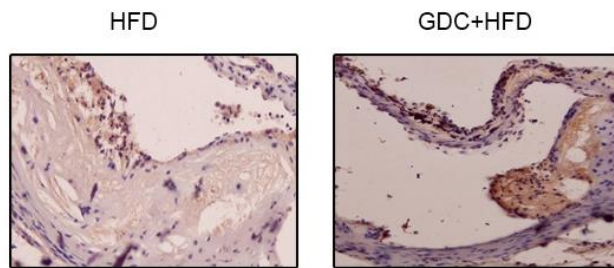

#### Figure legend

The level of caspase-3 was assessed by immunohistochemical staining, and then photographed using an inverted microscope.
